# Supplementary material
Source: publisher figshare collection journal article supplement (https://acs.figshare.com/ndownloader/files/9778828)

Pentacene 4000 ms IRMPD

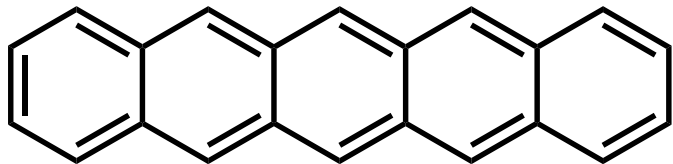

$M^{\bullet+}$   
 $[M+H]^+ \rightarrow$  minority

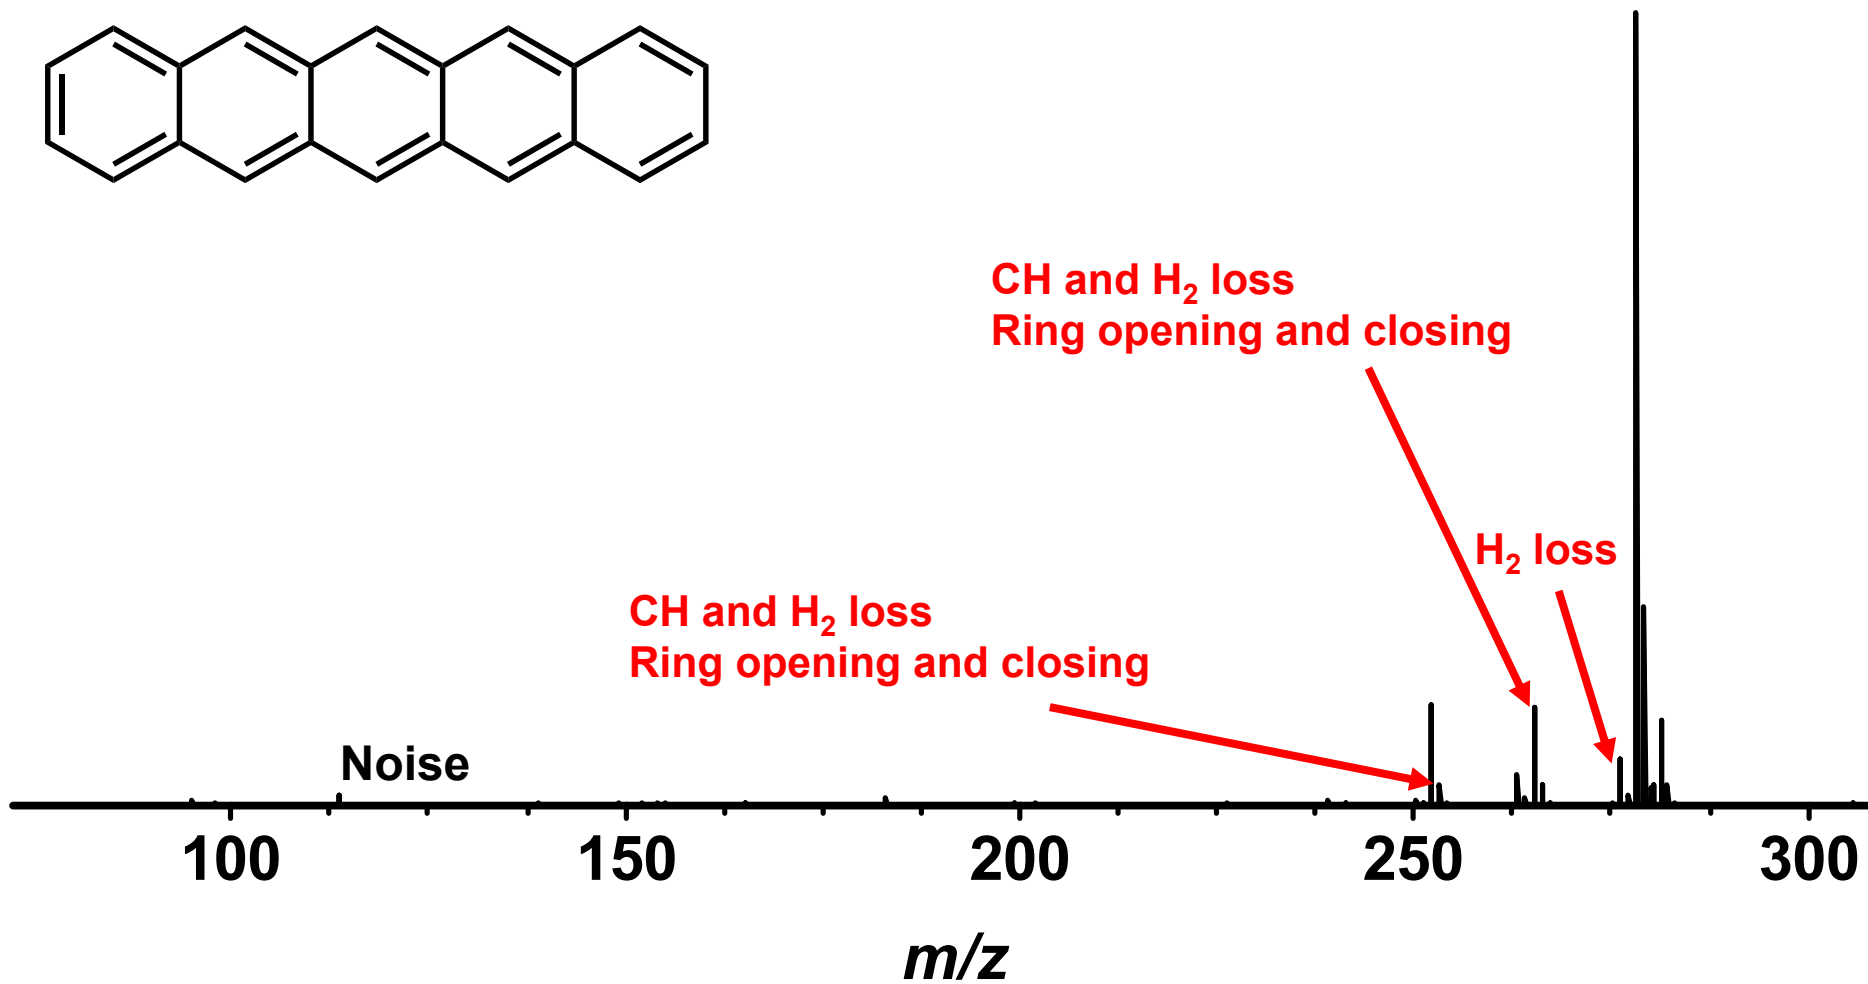

Figure S6

Supplement: Supplementary file 1 [file 9778828]
